# Supplementary material for: GeCoViz: genomic context visualisation of prokaryotic genes from a functional and evolutionary perspective
Source: PubMed Central journal article supplement (PMC9252766; doi:10.1093/nar/gkac367), 2022-05-26
Supplement: gkac367_supplemental_file.pdf [file gkac367_supplemental_file.pdf]

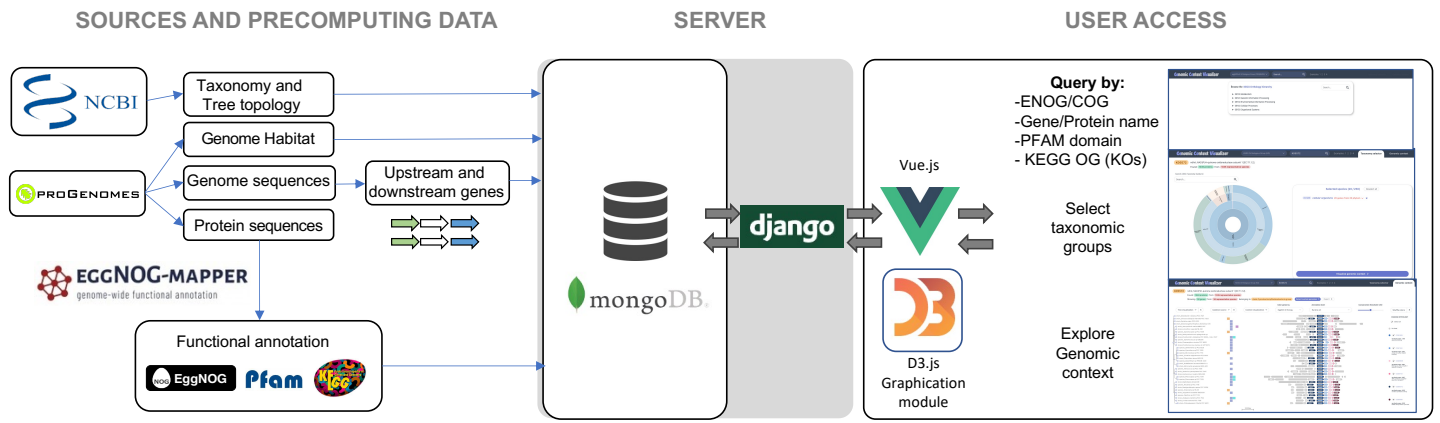

**Supplementary figure S1.** Data flow and technical implementation in GeCoViz.
